# Supplementary material
Source: ML conference proceedings conference paper supplement (https://proceedings.neurips.cc/paper_files/paper/2015/hash/9ac403da7947a183884c18a67d3aa8de-Abstract.html)
Supplement: Supplementary file [file 9ac403da7947a183884c18a67d3aa8de-Supplemental.zip]

---

# Supplementary Material to Segregated Graphs and Marginals of Chain Graph Models

---

Ilya Shpitser  
Department of Computer Science  
Johns Hopkins University  
ilyas@cs.jhu.edu

## 1 Proofs

**Lemma 3.1.** *The Markov properties defined by superactive routes (walks) [10] in CGs,  $m$ -separation [8] in ADMGs, and  $d$ -separation [6] in DAGs are special cases of the Markov property defined by  $s$ -separation in SGs.*

*Proof:* An argument that  $d$ -separation in DAGs is a special case of the separation criterion based on superactive routes appears in [10]. An argument that  $d$ -separation in DAGs is a special case of  $m$ -separation in ADMGs trivially follows by definition. That separation based on superactive routes is a special case of  $s$ -separation follows from the fact that CGs are a special case of SGs with no  $\leftrightarrow$  edges, which implies only directed edges can result in collider sections in CGs. That  $m$ -separation is a special case of  $s$ -separation follows by extension of the argument in [10].  $\square$

**Lemma 4.1.** *For  $V$  sensitive in a SG  $\mathcal{G}$ , let  $\mathcal{G}^{(V)}$  be the graph be obtained from  $\mathcal{G}$  by replacing all  $-$  edges adjacent to  $V$  by  $\rightarrow$  edges pointing away from  $V$ . Then  $\mathcal{G}^{(V)}$  is an SG, and  $\mathcal{P}(\mathcal{G}) = \mathcal{P}(\mathcal{G}^{(V)})$ .*

*Proof:* Since  $\mathcal{G}^{(V)}$  is constructed from an SG by replacing certain  $-$  edges by  $\rightarrow$ , then if  $\mathcal{G}$  does not contain  $\circ \leftrightarrow \circ - \circ$ , then neither does  $\mathcal{G}^{(V)}$ . If  $\mathcal{G}^{(V)}$  contains a partially directed cycle not including  $V$ , so does  $\mathcal{G}$ , which is a contradiction. If  $\mathcal{G}^{(V)}$  contains a partially directed cycle including  $V$ , then it must be via a subpath  $\circ \rightarrow V \rightarrow \circ$ , with all other edges on the path present in  $\mathcal{G}$ . But either the outgoing edge from  $V$  that is on the cycle is also present in  $\mathcal{G}$  or it is undirected. In both cases, there is still a partially directed cycle in  $\mathcal{G}$ , which is a contradiction. Thus  $\mathcal{G}^{(V)}$  is a SG. If  $V$  has no adjacent  $-$  edges,  $\mathcal{G} = \mathcal{G}^{(V)}$ .

Assume  $(\mathbf{A} \not\perp \mathbf{B} \mid \mathbf{C})_{\mathcal{G}^{(V)}}$ . Fix a walk  $\alpha$  from  $\mathbf{A}$  to  $\mathbf{B}$   $s$ -connected by  $\mathbf{C}$  in  $\mathcal{G}^{(V)}$ . We will construct an  $s$ -connected walk  $\alpha^*$  from  $\mathbf{A}$  to  $\mathbf{B}$  given  $\mathbf{C}$  in  $\mathcal{G}$ . By definition, every collider section in  $\alpha$  intersects  $\mathbf{C}$  and every non-collider section in  $\alpha$  is free of  $\mathbf{C}$ . Any section of  $\alpha$  where  $V$  does not occur either remains a section of  $\alpha$  in  $\mathcal{G}$ , and retains its open status (if its neighboring edges do not change status in  $\mathcal{G}$ ), or is subsumed by the argument for the following case. We now consider all sections  $\beta_i$  of  $\alpha$  where  $V$  occurs. Note that  $\beta_i$  is a singleton section. If  $\beta_i$  is a collider section,  $V \in \mathbf{C}$ , and  $\beta_i$  exists in  $\mathcal{G}$ . Assume  $\beta_i$  is a non-collider section. Then  $V \notin \mathbf{C}$ . If  $\beta_i$  is in  $\mathcal{G}$ , we are done. Otherwise, consider a section  $\beta_j$  in  $\alpha^*$  containing sections  $\beta_{i-l}, \dots, \beta_{i+k}$  in  $\alpha$ . By definition of  $\mathcal{G}^{(V)}$ , all sections except possibly  $\beta_{i-l}$  and  $\beta_{i+k}$  are either of the form  $\leftarrow V \rightarrow$  or collider sections. Note that since  $\alpha$  is open, all collider sections intersect  $\mathbf{C}$ .

If  $\beta_j$  is a collider section, we are done. Otherwise, we have two cases. If both neighboring edges along  $\alpha^*$  into  $\beta_j$  are not into  $\beta_j$ , then  $\beta_i \leftarrow V \rightarrow \beta_{i+k}$  shares the same endpoint behavior as  $\beta_j$  and is open, since  $\beta_i, \leftarrow V \rightarrow$ , and  $\beta_{i+k}$  are non-collider sections in  $\alpha$  and thus do not intersect  $\mathbf{C}$ . If a single neighboring edge along  $\alpha^*$  into  $\beta_j$  is into  $\beta_j$  (say into  $\beta_{i-l}$ ), then either that edge is from  $V$  or not. If it is from  $V$ , the section  $V \rightarrow \beta_{i+k}$  shares the same endpoint behavior as  $\beta_j$  and is open. If it is not from  $V$ , but another edge  $W$ , then since  $V$  is sensitive,  $W \rightarrow V$  exists in  $\mathcal{G}$ , and the section  $W \rightarrow V \rightarrow \beta_{i+k}$  shares the same endpoint behavior as  $\beta_j$  and is open.

Assume  $(\mathbf{A} \not\perp \mathbf{B} \mid \mathbf{C})_{\mathcal{G}}$ . Fix a walk  $\alpha$  from  $\mathbf{A}$  to  $\mathbf{B}$  s-connected by  $\mathbf{C}$  in  $\mathcal{G}$ . We will construct an s-connected walk from  $\mathbf{A}$  to  $\mathbf{B}$  given  $\mathbf{C}$  in  $\mathcal{G}^{(V)}$ . By definition, every collider section in  $\alpha$  intersects  $\mathbf{C}$  and every non-collider section in  $\alpha$  is free of  $\mathbf{C}$ . Any section of  $\alpha$  where  $V$  does not occur remains a section of  $\alpha$  in  $\mathcal{G}^{(V)}$ , and retains its open status. We now consider all sections  $\beta_i$  of  $\alpha$  where  $V$  occurs.

Assume  $\beta_i$  is a collider section with end points  $Z, W$ . If  $V \in \mathbf{C}$ , then since  $V$  is sensitive,  $Z \rightarrow V \leftarrow W$  is present in  $\mathcal{G}^{(V)}$ . Then we can construct a walk  $\alpha'$  which shares all sections with  $\alpha$  except  $\beta_i$  is replaced by  $Z \rightarrow V \leftarrow W$ , which is open since  $V \in \mathbf{C}$ . If  $V \notin \mathbf{C}$ , then there must be some section  $\beta_j$  in  $\beta_i$  in  $\mathcal{G}^{(V)}$  intersecting  $\mathbf{C}$ . This section either has  $V$  as both endpoints, or  $V$  and an endpoint  $Z$  of  $\beta_i$  with an arrowhead into  $\beta_i$ . We can then replace  $\alpha$  with another walk  $\alpha'$  which shares all sections with  $\alpha$  except  $\beta_i$  is replaced either by  $W \rightarrow V \beta_j V \leftarrow Z$ , or  $W \rightarrow V \beta_j \leftarrow Z$ , which is open since  $\beta_j$  intersects  $\mathbf{C}$ . In either case, we then repeat the argument for other sections of  $\alpha'$ .

Assume  $\beta_i$  is a non-collider section with end points  $Z, W$ , and does not intersect  $\mathbf{C}$ . This means there is at most one arrowhead into  $\beta_i$ , say from  $Z$ , or no arrowheads into  $\beta_i$ . In the former case, fix the section  $\beta_j$  (possibly of length 0 if  $V = W$ ) in  $\mathcal{G}^{(V)}$  between the last occurrence of  $V$  and  $W$  in  $\beta_i$ . Replace  $\alpha$  by a walk  $\alpha'$  sharing all sections with  $\alpha$  except  $\beta_i$  is replaced with  $Z \rightarrow V \beta_j W$ , which is open. If no arrowheads are into  $\beta_i$ , let  $\beta_j$  be the part of  $\beta_i$  from  $Z$  to first occurrence of  $V$ , and  $\beta_k$  be the part of  $\beta_i$  from the last occurrence of  $V$  to  $W$ . Replace  $\alpha$  by a walk  $\alpha'$  sharing all sections with  $\alpha$  except  $\beta_i$  is replaced by  $Z \beta_j V \beta_k W$ . In all cases, the newly added sections to  $\alpha'$  are open and share end edge behavior with sections they are replacing. We then repeat the argument for other sections of  $\alpha'$ . Thus,  $(\mathbf{A} \not\perp \mathbf{B} \mid \mathbf{C})_{\mathcal{G}^{(V)}}$ .  $\square$

**Lemma 4.2.** *Let  $\mathcal{G}$  be an SG, and  $\mathcal{G}'$  a graph obtained from adding an edge  $W \rightarrow V$  for two non-adjacent vertices  $W, V$  where  $W \rightarrow \circ - \dots - \circ - V$  exists in  $\mathcal{G}$ . Then  $\mathcal{G}'$  is an SG.*

*Proof:* Since  $\mathcal{G}$  is an SG, and we are adding only  $\rightarrow$  edges to  $\mathcal{G}'$ , then there is no  $\circ \leftrightarrow \circ - \circ$  structure in  $\mathcal{G}'$ . If there were a partially directed cycle involving  $W \rightarrow V$  in  $\mathcal{G}'$ , then replacing  $W \rightarrow V$  by  $W \rightarrow \circ - \dots - \circ - V$  in the cycle would still result in a partially directed cycle, which would also be present in  $\mathcal{G}$ . But this is a contradiction.  $\square$

**Lemma 4.3.** *For any  $V$  in an SG  $\mathcal{G}$ , let  $\mathcal{G}^{\overline{V}}$  be obtained from  $\mathcal{G}$  by adding  $W \rightarrow Z$ , whenever  $W \rightarrow \circ - \dots - \circ - Z \leftarrow V$  exists in  $\mathcal{G}$ . Then  $\mathcal{G}^{\overline{V}}$  is an SG, and  $\mathcal{P}(\mathcal{G})^V = \mathcal{P}(\mathcal{G}^{\overline{V}})^V$ .*

*Proof:*  $\mathcal{G}^{\overline{V}}$  is an SG by an inductive application of Lemma 4.2. If  $\mathbf{A} \not\perp \mathbf{B} \mid \mathbf{C}$  holds in  $\mathcal{G}^{\overline{V}}$ , then  $\mathbf{A} \not\perp \mathbf{B} \mid \mathbf{C}$  holds in  $\mathcal{G}$ , since  $\mathcal{G}$  is an edge subgraph of  $\mathcal{G}^{\overline{V}}$ .

Assume  $(\mathbf{A} \not\perp \mathbf{B} \mid \mathbf{C})_{\mathcal{G}}$ , where  $V \notin \mathbf{A} \cup \mathbf{B} \cup \mathbf{C}$ . Fix a walk  $\alpha$  from  $\mathbf{A}$  to  $\mathbf{B}$  in  $\mathcal{G}^{\overline{V}}$ . If  $\alpha$  exists in  $\mathcal{G}$ , then it retains the same edges in  $\mathcal{G}^{\overline{V}}$ , which implies if  $\alpha$  is s-separated by  $\mathbf{S}$  in  $\mathcal{G}$ , it is also in  $\mathcal{G}^{\overline{V}}$ . Assume  $\alpha$  does not exist in  $\mathcal{G}$  and is s-connected given  $\mathbf{C}$ . This means  $\alpha$  contains a set of edges of the form  $W \rightarrow Z$  which do not exist in  $\mathcal{G}$ . We will repeatedly replace edges  $W \rightarrow Z$  in  $\alpha$  by sections that exist in  $\mathcal{G}$  while preserving the open status of the resulting walk. In this way, we will construct a new walk that is s-connected given  $\mathbf{C}$  and exists in  $\mathcal{G}$ , deriving a contradiction.

Pick an edge  $W \rightarrow Z$  in  $\alpha$  that does not exist in  $\mathcal{G}$ , let  $\beta_j$  be the section of  $\alpha$  starting at  $Z$  with  $W \rightarrow Z$  pointing into it. By definition of  $\mathcal{G}^{\overline{V}}$ , there exists  $\beta_i \equiv W \rightarrow \circ - \dots - \circ - Z$  in  $\mathcal{G}$ . If  $\beta_j$  is a collider section, then replace  $W \rightarrow \beta_j$  by  $\beta_i \beta_j$ . The new extended section is thus also a collider section intersecting  $\mathbf{C}$ , and exists in  $\mathcal{G}$ . If  $\beta_j$  is not a collider section, then either  $\beta_i$  intersects  $\mathbf{C}$  or not. If it does, replace  $W \rightarrow \beta_j$  by  $\beta_i \leftarrow V \rightarrow \beta_j$ . This results in three new sections which are all open given  $\mathbf{C}$ , exist in  $\mathcal{G}$ , and have same endpoint behavior as  $\beta_j$ . If it does not, replace  $W \rightarrow \beta_j$  by  $\beta_i \beta_j$ . This results in a new extended section which is a non-collider section that does not intersect  $\mathbf{C}$ , exists in  $\mathcal{G}$ , and has same endpoint behavior as  $\beta_j$ .

Repeating the argument for every  $W \rightarrow V$  that does not exist in  $\mathcal{G}$  gives us the contradiction.  $\square$

**Theorem 4.1.** *If  $\mathcal{G}$  is an SG with at least 2 vertices  $\mathbf{V}$ , and  $V \in \mathbf{V}$ , there exists an SG  $\mathcal{G}^V$  with vertices  $\mathbf{V} \setminus \{V\}$  such that  $\mathcal{P}(\mathcal{G})^V = \mathcal{P}(\mathcal{G}^V)^V$ .*

*Proof:* Construct  $\mathcal{G}^V$  as in Lemma 4.4. Construct  $\mathcal{G}^V$  from  $\mathcal{G}^V$  as follows. Retain all vertices in  $\mathbf{V} \setminus \{V\}$  and edges between them. For any two vertices  $W, Z$ : if  $W \rightarrow V \rightarrow Z$ , add  $W \rightarrow Z$ ; if

$W \leftarrow V \rightarrow Z$ , add  $W \leftrightarrow Z$ ; if  $W - V - Z$ , add  $W - Z$ ; if  $W - V \rightarrow Z$ , add  $W \rightarrow Z$ ; and if  $W \rightarrow V - Z$ , add  $W \rightarrow Z$ .

Because  $\mathcal{G}^\vee$  is a SG with no  $V \rightarrow \circ - \circ$ , there is no  $\circ \leftrightarrow \circ - \circ$  structure in  $\mathcal{G}^\vee$ . Assume there exists a partially directed cycle in  $\mathcal{G}^\vee$  involving new edges. Then we can systematically replace them by the two edge paths in  $\mathcal{G}$  to yield a partially directed cycle in  $\mathcal{G}$ , giving a contradiction.

Let  $\mathcal{G}^{V^\dagger}$  be an edge supergraph of  $\mathcal{G}^\vee$  where we add all edges in  $\mathcal{G}^\vee$  that do not exist in  $\mathcal{G}$ . We first show  $\mathcal{P}(\mathcal{G}^{V^\dagger})^V = \mathcal{P}(\mathcal{G}^\vee)^V$ . If  $(\mathbf{A} \perp\!\!\!\perp \mathbf{B} \mid \mathbf{C})_{\mathcal{G}^{V^\dagger}}$ , then  $(\mathbf{A} \perp\!\!\!\perp \mathbf{B} \mid \mathbf{C})_{\mathcal{G}^\vee}$  because  $\mathcal{G}^{V^\dagger}$  is an edge supergraph of  $\mathcal{G}^\vee$ . Assume  $(\mathbf{A} \perp\!\!\!\perp \mathbf{B} \mid \mathbf{C})_{\mathcal{G}^\vee}$ , and fix a walk  $\alpha$  from  $\mathbf{A}$  to  $\mathbf{B}$  that is s-connected given  $\mathbf{C}$  in  $\mathcal{G}^{V^\dagger}$ . If  $\alpha$  exists in  $\mathcal{G}^\vee$ , we have a contradiction. Otherwise, since  $V \notin \mathbf{A} \cup \mathbf{B} \cup \mathbf{C}$ , it is easy to construct a walk  $\alpha'$  that is s-connected given  $\mathbf{C}$  and exists in  $\mathcal{G}^\vee$  by replacing edges in  $\alpha$  that do not exist in  $\mathcal{G}^\vee$  by their corresponding two edges used in the construction of  $\mathcal{G}^\vee$ .

Finally, we show that  $\mathcal{P}(\mathcal{G}^{V^\dagger})^V = \mathcal{P}(\mathcal{G}^V)^V$ . Since  $\mathcal{G}^{V^\dagger}$  is an edge supergraph of  $\mathcal{G}^V$ , if  $\mathbf{A} \perp\!\!\!\perp \mathbf{B} \mid \mathbf{C}$  in  $\mathcal{G}^{V^\dagger}$ , then  $\mathbf{A} \perp\!\!\!\perp \mathbf{B} \mid \mathbf{C}$  in  $\mathcal{G}^V$ . If  $\mathbf{A} \perp\!\!\!\perp \mathbf{B} \mid \mathbf{C}$  in  $\mathcal{G}^V$ , and there is a s-connecting walk  $\alpha$  from  $\mathbf{A}$  to  $\mathbf{B}$  given  $\mathbf{C}$  in  $\mathcal{G}^{V^\dagger}$ , it must involve  $V$ . But we can construct a walk  $\alpha'$  that does not contain  $V$  by replacing  $V$  containing segments by edges connecting nodes adjacent to  $V$  following above rules used to construct  $\mathcal{G}^V$ . It is easy to see  $\alpha'$  is s-connecting given  $\mathbf{C}$  if  $\alpha$  is. This is a contradiction.  $\square$

**Corollary 4.1.** *Let  $\mathcal{G}$  be an SG with vertices  $\mathbf{V}$ . Then for any  $\mathbf{W} \subset \mathbf{V}$ , there exists an SG  $\mathcal{G}^*$  with vertices  $\mathbf{V} \setminus \mathbf{W}$  such that  $\mathcal{P}(\mathcal{G})^\mathbf{W} = \mathcal{P}(\mathcal{G}^*)$ .*

*Proof:* Follows by an inductive application of Theorem 4.1 for any ordering of vertices in  $\mathbf{W}$ .  $\square$

**Lemma 5.1.** *If  $p(\mathbf{V})$  factorizes with respect to  $\mathcal{G}$  then  $f_{\mathbf{S}}(\mathbf{S} \mid \text{pa}_{\mathcal{G}}^s(\mathbf{S})) = p(\mathbf{S} \mid \text{pa}_{\mathcal{G}}^s(\mathbf{S}))$  for every  $\mathbf{S} \in \mathcal{B}^*(\mathcal{G})$ , and  $f_{\mathbf{S}}(\mathbf{S} \mid \text{pa}_{\mathcal{G}}^s(\mathbf{S})) = \prod_{V \in \mathbf{S}} p(V \mid \text{pre}_{\mathcal{G}, \prec}(V) \cap \text{ant}_{\mathcal{G}}(\mathbf{S}))$  for every  $\mathbf{S} \in \mathcal{D}^a(\mathcal{G})$  and any topological ordering  $\prec$  on  $\mathcal{G}$ .*

*Proof:* We will proceed by induction on antieral subgraphs. We will add either a singleton vertex that will become a new singleton district or a part of an existing district, or a block of vertices  $\mathbf{S}$  to construct  $\mathcal{G}$  with vertices  $\mathbf{V}$ , such that  $\mathbf{V} \setminus \mathbf{S} \in \mathcal{A}(\mathcal{G})$ . For the base case, the conclusion clearly holds for  $\mathcal{G}$  with a single vertex. Assume the inductive hypothesis holds for  $\mathcal{G}^i$ , and we added a block  $\mathbf{S}$  to  $\mathcal{G}^i$  to yield  $\mathcal{G}$ , where  $\mathbf{S} \in \mathcal{B}^*(\mathcal{G})$ . By the inductive hypothesis,  $p(\mathbf{V}) = f_{\mathbf{S}}(\mathbf{S} \mid \text{pa}_{\mathcal{G}}^s(\mathbf{S})) \cdot \prod_{\mathbf{S} \in \mathcal{D}(\mathcal{G}^i) \cup \mathcal{B}^*(\mathcal{G}^i)} p(\mathbf{S} \mid \text{pa}_{\mathcal{G}^i}^s(\mathbf{S}))$ . This implies our conclusion. Assume the inductive hypothesis holds for  $\mathcal{G}^i$ , and we added  $V$  to  $\mathcal{G}^i$  to yield  $\mathcal{G}$ , where  $V \in \mathbf{S} \in \mathcal{D}(\mathcal{G})$ . Then the conclusion follows by a simple extension of the argument used to prove Lemma 1 in [11].  $\square$

**Theorem 5.1.** *If  $p(\mathbf{V})$  factorizes with respect to a SG  $\mathcal{G}$ , then  $p(\mathbf{V}) \in \mathcal{P}^a(\mathcal{G})$ .*

*Proof:* Implied by the fact that the UG factorization implies the UG global Markov property [5].  $\square$

**Lemma 5.2.** *If there exists a walk  $\alpha$  in  $\mathcal{G}$  between  $A \in \mathbf{A}, B \in \mathbf{B}$  with all non-collider sections not intersecting  $\mathbf{C}$ , and all collider sections in  $\text{ant}_{\mathcal{G}}(\mathbf{A} \cup \mathbf{B} \cup \mathbf{C})$ , then there exist  $A^* \in \mathbf{A}, B^* \in \mathbf{B}$  such that  $A^*$  and  $B^*$  are s-connected given  $\mathbf{C}$  in  $\mathcal{G}$ .<sup>1</sup>*

*Proof:* Let  $D$  be the last vertex on  $\alpha$  in  $\text{ant}_{\mathcal{G}}(\mathbf{A}) \setminus \text{ant}_{\mathcal{G}}(\mathbf{C})$  if such a vertex exists, or  $D \equiv A$  otherwise. Let  $E$  be the first vertex in  $\text{ant}_{\mathcal{G}}(\mathbf{B}) \setminus \text{ant}_{\mathcal{G}}(\mathbf{C})$  which occurs between the last occurrence of  $D$  in  $\alpha$  and  $B$ , if such a vertex exists, or  $E \equiv B$  otherwise. If  $D \neq A$ , let  $A^*$  be any vertex such that  $D \in \text{ant}_{\mathcal{G}}(A^*)$ , otherwise let  $A^* \equiv A$ . Similarly, if  $E \neq B$ , let  $B^*$  be any vertex such that  $E \in \text{ant}_{\mathcal{G}}(B^*)$ , otherwise let  $B^* \equiv B$ .

Let  $\alpha^*$  be the subwalk of  $\alpha$  between the last occurrence of  $D$  and the first occurrence of  $E$ . Then: (a) every vertex in  $\alpha^*$  is in  $\text{ant}_{\mathcal{G}}(\mathbf{C})$ ; (b) there is a partially directed path  $\delta$  from  $D$  to  $A^*$ , and  $\epsilon$  from  $E$  to  $B^*$ ; (c) other than possibly  $D$  or  $E$ , no vertex in  $\delta$  or  $\epsilon$  is in  $\text{ant}_{\mathcal{G}}(\mathbf{C})$ ; and (d) no vertex in  $\epsilon$  other than possibly  $E$  is an ancestor of  $A^*$ .

It follows from (a) and (c) that  $\alpha^*$  and  $\epsilon$  only intersect at  $E$ , and  $\alpha^*$  and  $\delta$  only intersect at  $D$ . Let  $\beta$  be a walk obtained by concatenating  $\delta, \alpha^*$ , and  $\gamma$ . By construction, every collider section in  $\alpha^*$  is in  $\text{ant}_{\mathcal{G}}(\mathbf{C})$ , every non-collider section in  $\alpha^*$  does not intersect  $\mathbf{C}$ . Furthermore, every section in  $\delta$  and  $\epsilon$  is non-collider and does not intersect  $\mathbf{C}$ . Thus  $\beta$  is s-connecting given  $\mathbf{C}$ .  $\square$

<sup>1</sup>The proof follows the proof of lemma 1 in [8].

**Theorem 5.2.**  $\mathcal{P}(\mathcal{G}) = \mathcal{P}^a(\mathcal{G})$ .<sup>2</sup>

*Proof:* Fix disjoint  $\mathbf{A}, \mathbf{B}, \mathbf{C}$ , and consider the smallest arterial set  $\mathbf{A}^\dagger$  containing  $\mathbf{A}, \mathbf{B}, \mathbf{C}$ . By definition of s-separation, it suffices to restrict our attention to walks contained in  $\mathbf{A}^\dagger$ . Fix a walk  $\alpha$  from  $A \in \mathbf{A}$  to  $B \in \mathbf{B}$  open in  $\mathcal{G}_{\mathbf{A}^\dagger}$  given  $\mathbf{C}$ . We will construct a path  $\beta$  from  $A$  to  $B$  in  $(\mathcal{G}_{\mathbf{A}^\dagger})^a$  which does not intersect  $\mathbf{C}$ . Since  $\alpha$  is open, every section  $\alpha_1, \dots, \alpha_k$  in  $\alpha$  is open. We will first construct a walk  $\alpha^\dagger$  in  $(\mathcal{G}_{\mathbf{A}^\dagger})^a$  consisting of fragments corresponding to sections in  $\alpha$ , and then simplify this walk to a path that does not intersect  $\mathbf{C}$ . If  $\alpha_i$  is a non-collider section, let  $\alpha_i^\dagger$  consist of the undirected edges corresponding to those in  $\alpha_i$ . If  $\alpha_i$  is a collider section with end points  $C, D$ , let  $\alpha_i^\dagger$  consist of  $C - D$ . Then the starting vertex of  $\alpha_1^\dagger$  is  $A$ , the ending vertex of  $\alpha_k^\dagger$  is  $B$ ,  $\alpha_1^\dagger, \dots, \alpha_k^\dagger$  are undirected walks that do not intersect  $\mathbf{C}$  by construction, and for each  $i \in 1, \dots, k-1$  either  $\alpha_i^\dagger$  shares the ending vertex with the starting vertex of  $\alpha_{i+1}^\dagger$ , or the ending vertex of  $\alpha_i^\dagger$  and the starting vertex of  $\alpha_{i+1}^\dagger$  are neighbors. Thus, we can construct a walk from these walks with a starting vertex  $A$ , ending vertex  $B$ , and which does not intersect  $\mathbf{C}$ . But this means we can construct a path  $\beta$  with the same property.

Fix a minimal path  $\beta$  from  $A \in \mathbf{B}$  to  $B \in \mathbf{B}$  that does not intersect  $\mathbf{C}$  in  $(\mathcal{G}_{\mathbf{A}^\dagger})^a$ . We will construct a walk  $\alpha$  from  $A$  to  $B$  s-connected given  $\mathbf{C}$  in  $\mathcal{G}_{\mathbf{A}^\dagger}$ . Let the edges of  $\beta$  be  $b_1, \dots, b_k$ . We will construct  $\alpha$  by replacing all  $b_i$  that do not exist in  $\mathcal{G}_{\mathbf{A}^\dagger}$  by a witnessing collider walk, and all other  $b_i$  between  $C, D$  by the (possibly directed or bidirected) edge between  $C, D$  in  $\mathcal{G}_{\mathbf{A}^\dagger}$ . The result is clearly a walk. Furthermore, all non-collider sections on this walk do not intersect  $\mathbf{C}$ , and all collider sections are in  $\mathbf{A}^\dagger$ , so in the anterior of  $\mathbf{A} \cup \mathbf{B} \cup \mathbf{C}$ . By lemma 5.2, there exists a walk from  $A$  to  $B$  s-connected given  $\mathbf{C}$  in  $\mathbf{A}^\dagger$ .  $\square$

**Theorem 5.3.** For a SG  $\mathcal{G}$ , if  $p(\mathbf{V}) \in \mathcal{P}(\mathcal{G})$  and is positive, then  $p(\mathbf{V})$  factorizes with respect to  $\mathcal{G}$ .

*Proof:* Fix any  $\mathbf{D} \in \mathcal{A}(\mathcal{G})$ , and a topological ordering  $\prec$ . By the chain rule of probabilities,  $p(\mathbf{D}) = \prod_{V \in \mathbf{D}} p(V \mid \text{pre}_{\mathcal{G}, \prec}(V) \cap \mathbf{D})$  which is equal to  $\prod_{\mathbf{S} \in \mathcal{D}^a(\mathcal{G}_{\mathbf{D}}) \cup \mathcal{B}^*(\mathcal{G}_{\mathbf{D}})} \prod_{V \in \mathbf{S}} p(V \mid \text{pre}_{\mathcal{G}, \prec}(V) \cap \mathbf{D})$  since non-trivial blocks and districts partition  $\mathbf{V}$ . This in turn is equal to  $\prod_{\mathbf{S} \in \mathcal{D}^a(\mathcal{G}_{\mathbf{D}}) \cup \mathcal{B}^*(\mathcal{G}_{\mathbf{D}})} \prod_{V \in \mathbf{S}} p(V \mid \text{pre}_{\mathcal{G}, \prec}(V) \cap \text{pa}_{\mathcal{G}}^*(\mathbf{S}))$ , by assumption. This implies that we obtain the outer level factorization:  $p(\mathbf{D}) = \prod_{\mathbf{S} \in \mathcal{D}^a(\mathcal{G}_{\mathbf{D}}) \cup \mathcal{B}^*(\mathcal{G}_{\mathbf{D}})} f_{\mathbf{S}}(\mathbf{S} \mid \text{pa}_{\mathcal{G}}^*(\mathbf{S}))$ . That the inner factorization holds for any  $f_{\mathbf{S}}(\mathbf{S} \mid \text{pa}_{\mathcal{G}}^*(\mathbf{S}))$  for  $\mathbf{S} \in \mathcal{B}^*(\mathcal{G})$  for a positive  $p(\mathbf{V})$  follows from Theorem 3.36 in [5] (and ultimately the Hammersley Clifford theorem for UG models).  $\square$

## References

- [1] J. Bell. On the Einstein Podolsky Rosen paradox. *Physics*, 1(3):195–200, 1964.
- [2] Z. Cai, M. Kuroki, J. Pearl, and J. Tian. Bounds on direct effects in the presence of confounded intermediate variables. *Biometrics*, 64:695 – 701, 2008.
- [3] M. Drton. Discrete chain graph models. *Bernoulli*, 15(3):736–753, 2009.
- [4] R. J. Evans and T. S. Richardson. Markovian acyclic directed mixed graphs for discrete data. *Annals of Statistics*, pages 1–30, 2014.
- [5] S. Lauritzen. *Graphical Models*. Oxford, U.K.: Clarendon, 1996.
- [6] J. Pearl. *Probabilistic Reasoning in Intelligent Systems*. Morgan and Kaufmann, San Mateo, 1988.
- [7] T. Richardson and P. Spirtes. Ancestral graph Markov models. *Annals of Statistics*, 30:962–1030, 2002.
- [8] T. S. Richardson. Markov properties for acyclic directed mixed graphs. *Scandinavian Journal of Statistics*, 30(1):145–157, 2003.
- [9] I. Shpitser, R. J. Evans, T. S. Richardson, and J. M. Robins. Introduction to nested Markov models. *Behaviormetrika*, 41(1):3–39, 2014.
- [10] M. Studeny. Bayesian networks from the point of view of chain graphs. In *Proceedings of the Fourteenth Conference on Uncertainty in Artificial Intelligence (UAI-98)*, pages 496–503. Morgan Kaufmann, San Francisco, CA, 1998.
- [11] J. Tian and J. Pearl. A general identification condition for causal effects. In *Eighteenth National Conference on Artificial Intelligence*, pages 567–573, 2002.

<sup>2</sup>This proof follows lemma 3 in [8].

- [12] T. J. VanderWeele, E. J. T. Tchetgen, and M. E. Halloran. Components of the indirect effect in vaccine trials: identification of contagion and infectiousness effects. *Epidemiology*, 23(5):751–761, 2012.
- [13] T. S. Verma and J. Pearl. Equivalence and synthesis of causal models. Technical Report R-150, Department of Computer Science, University of California, Los Angeles, 1990.
